# Supplementary material for: Long-term resource addition to a detrital food web yields a pattern of responses more complex than pervasive bottom-up control
Source: PeerJ journal article supplement (doi:10.7717/peerj.3572), 2017-07-21
Supplement: Supplemental_Appendix_S6.pdf [file Supplemental_Appendix_S6.pdf]

## Supplemental Appendix S6:

Results of univariate analyses and patterns of CAP vector overlays, Tables S6.1 to S6.4.

### KEY to Tables S6.1 to S6.4:

**Multivariate:** Entry indicates the presence of a vector in one of the CAP ordination plots in Figure 3.

|          |                                                                                                      |
|----------|------------------------------------------------------------------------------------------------------|
| Simple   | = Spearman rank correlation                                                                          |
| Multiple | = Multiple (partial correlation coefficient)                                                         |
| x        | = Vector correlated with a CAP axis, but no correlation with the Resource treatment (Summer, Year 1) |
| +        | = Positive correlation between response variable and the Resource treatment                          |
| -        | = Negative correlation between response variable and the Resource treatment                          |
| Y2, Y3   | = Years 2, Years 3                                                                                   |

**Univariate:** Numerical entry is the *P* value of the term (interaction or main effect) from the statistical model. *P* values  $\leq .10$  are highlighted in **bold**.

|           |                                                                                                                                     |
|-----------|-------------------------------------------------------------------------------------------------------------------------------------|
| Model     | = Statistical model used to model the data, all run in R [Y1: in separate column; Y2+Y3, in () with <i>P</i> for 3-way interaction] |
| L         | = Linear Model                                                                                                                      |
| L/Tr      | = Linear Model on transformed data                                                                                                  |
| P         | = Poisson Family for Generalized Linear Model (GLM; Y1) or Generalized Linear Mixed-effects Model (GLMM; Y2+Y3)                     |
| NB        | = Negative Binomial Family for GLM or GLMM                                                                                          |
| Perm      | = PerMANOVA (Permutational Univariate Analysis of Variance)                                                                         |
| R         | = R (Ambient or Supplemented)                                                                                                       |
| Y         | = Year (Y1, Y2, Y3)                                                                                                                 |
| F         | = Fencing (Open or Fenced)                                                                                                          |
| R x Y x F | = Three-way interaction; tested first                                                                                               |
| R x Y     | = Two-way interaction if no three-way interaction; or separately for Open and Fenced plots                                          |
| R         | = Effect of Resource addition if no R x Y interaction; separately for Year if R x Y interaction                                     |

**Notes:** Comments on analyses with poorly behaved statistical models and/or analyses that are somewhat at odds with the patterns depicted in one of the univariate plots in Figures S5.1 to S5.18 in Supplementary Appendix S5

**Table S6.1: SUMMER, Year 1**

| Taxon<br>(response variable)   | Multivariate |          | Univariate  |       |             |       |             |        | Notes       |                                            |
|--------------------------------|--------------|----------|-------------|-------|-------------|-------|-------------|--------|-------------|--------------------------------------------|
|                                | Spearman     | Multiple | ALL PLOTS   |       |             | Open  |             | Fenced |             |                                            |
|                                |              |          | R x F       | Model | R           | Model | R           | Model  |             | R                                          |
| <i>Fungivores/Detritivores</i> |              |          |             |       |             |       |             |        |             |                                            |
| Hypogastruridae                |              |          | .73         | Perm  | 1.00        |       |             |        |             |                                            |
| Onychuridae                    |              |          | .64         | Perm  | .89         |       |             |        |             |                                            |
| Entomobryidae                  |              |          | .13         | NB    | <b>.037</b> |       |             |        |             |                                            |
| Isotomidae                     | <b>x</b>     | <b>x</b> | .39         | NB    | <b>.027</b> |       |             |        |             |                                            |
| Tomoceridae                    |              |          | .070        | Perm  | .32         |       | .20         |        | .15         |                                            |
| Sminthuridae                   |              |          | <b>.082</b> | NB    | <b>.046</b> | NB    | .57         | NB     | <b>.032</b> |                                            |
| Thysanoptera                   |              |          | 1.00        | NB    | .68         |       |             |        |             |                                            |
| Diptera (Trapped)              |              |          | .44         | L/P   | .21         |       |             |        |             |                                            |
| Lepidoptera larvae             |              |          | <b>.025</b> | NB    |             | NB    | <b>.008</b> | P      | .61         |                                            |
| Larval Diptera                 |              |          | .76         | Perm  | <b>.031</b> |       |             |        |             |                                            |
| Adult Diptera                  |              | <b>x</b> | <b>.014</b> | NB    |             | P     | .17         | NB     | <b>.039</b> |                                            |
|                                |              |          |             |       |             |       |             |        |             |                                            |
| <i>Mixed Trophic Levels</i>    |              |          |             |       |             |       |             |        |             |                                            |
| Larval Coleoptera              |              |          | <b>.020</b> | NB    |             | NB    | <b>.093</b> | NB     | .14         | <b>Examine Plots; no consistent effect</b> |
| Adult Coleoptera               |              |          | .87         | NB    | .39         |       |             |        |             |                                            |
|                                |              |          |             |       |             |       |             |        |             |                                            |
| <i>Predators</i>               |              |          |             |       |             |       |             |        |             |                                            |
| Cursorial spiders              |              |          | .16         | L     | .53         |       |             |        |             |                                            |
| All spiders<br>(Kempson)       |              |          | <b>.068</b> | Perm  | .39         | NB    | .72         | NB     | <b>.015</b> |                                            |
| Pseudoscorpiones               |              |          | .77         | NB    | .22         |       |             |        |             |                                            |
| Web spiders                    |              |          | .78         | L/NB  | .69         |       |             |        |             |                                            |
| Chilopoda                      |              |          | 1.00        | Perm  | .47         |       |             |        |             |                                            |

**Table S6.2: SUMMER, Years 2 and 3**

| Taxon<br>(response variable)   | Multivariate |    |          |    | Univariate                 |             |                                                                        |                     |             |             |             | Notes                                          |
|--------------------------------|--------------|----|----------|----|----------------------------|-------------|------------------------------------------------------------------------|---------------------|-------------|-------------|-------------|------------------------------------------------|
|                                | Spearman     |    | Multiple |    | ALL PLOTS                  |             |                                                                        | Open                |             | Fenced      |             |                                                |
|                                | Y2           | Y3 | Y2       | Y3 | R x Y x F<br>[Model in ()] | R x Y       | R                                                                      | R x Y               | R           | R x Y       | R           |                                                |
| <i>Fungivores/Detritivores</i> |              |    |          |    |                            |             |                                                                        |                     |             |             |             |                                                |
| Hypogastridae                  | +            | +  | +        | +  | <b>.012</b> (Perm)         |             |                                                                        | .32                 | .36         | .32         | .37         | <b>Examine Plots; poor model behavior</b>      |
| Onychuridae                    |              |    |          |    | .20 (Perm)                 | .18         | .19                                                                    |                     |             |             |             |                                                |
| Entomobryidae                  |              | +  |          |    | .23 (NB)                   | .67         | <b>.064</b>                                                            |                     |             |             |             |                                                |
| Isotomidae                     |              |    |          |    | .53 (Perm)                 | .64         | .37                                                                    |                     |             |             |             |                                                |
| Tomoceridae                    |              |    |          | -  | .44 (Perm)                 | <b>.066</b> | <b>Plot Means across Years: Resource = .11 [Yr2 = .91; Yr3 = .018]</b> |                     |             |             |             |                                                |
| Sminthuridae                   | +            |    |          |    | .84 (P)                    | <b>.003</b> | <b>Year2, Resource = .006; Year3, Resource = .31</b>                   |                     |             |             |             |                                                |
| Thysanoptera                   |              |    |          |    | <b>.025</b> (NB)           |             |                                                                        | .42                 | .12         | <b>.004</b> | <b>.009</b> |                                                |
| Diptera (Trapped)              | +            | +  |          |    | .31 (NB)                   | .11         | .11                                                                    |                     |             |             |             | <b>Examine Plots; marg. consistent effects</b> |
| Lepidoptera larvae             |              |    |          |    | <b>.011</b> (P)            |             |                                                                        | .45                 | <b>.10</b>  | <b>.002</b> | .20         |                                                |
| Larval Diptera                 |              |    |          |    | .35 (L)                    | .29         | .21                                                                    |                     |             |             |             |                                                |
| Adult Diptera                  | +            |    |          |    | .62 (NB)                   | .44         | .13                                                                    |                     |             |             |             |                                                |
| <i>Mixed Trophic Levels</i>    |              |    |          |    |                            |             |                                                                        |                     |             |             |             |                                                |
| Larval Coleoptera              |              | +  |          | +  | <b>.077</b> (NB)           | .69         | <b>.017</b>                                                            | <b>.061</b>         | .32         | .61         | <b>.002</b> |                                                |
| Adult Coleoptera               | +            | +  | +        |    | .97 (P)                    | .73         | .14                                                                    |                     |             |             |             |                                                |
| <i>Predators</i>               |              |    |          |    |                            |             |                                                                        |                     |             |             |             |                                                |
| Cur spiders                    |              |    |          |    | .76 (Perm)                 | .81         | .20                                                                    |                     |             |             |             |                                                |
| All spiders (Kempson)          |              |    |          | -  | .81 (P)                    | .25         | .46                                                                    |                     |             |             |             |                                                |
| Pseudoscorpiones               |              |    |          | -  | <b>.009</b> (P)            |             |                                                                        | .17 <sub>(NB)</sub> | <b>.038</b> | .28         | .51         | <b>Examine Plots; complex pattern</b>          |
| Web spiders                    |              |    |          |    | .50 (P)                    | <b>.091</b> | .77                                                                    |                     |             |             |             |                                                |
| Chilopoda                      |              |    |          |    | .64 (Perm)                 | .73         | .72                                                                    |                     |             |             |             |                                                |

**Table S6.3: FALL, Year 1**

| Taxon<br>(response variable)   | Multivariate |          | Univariate  |       |             |       |             |        |             | Notes                                 |
|--------------------------------|--------------|----------|-------------|-------|-------------|-------|-------------|--------|-------------|---------------------------------------|
|                                |              |          | ALL PLOTS   |       |             | Open  |             | Fenced |             |                                       |
|                                | Spearman     | Multiple | R x F       | Model | R           | Model | R           | Model  | R           |                                       |
| <i>Fungivores/Detritivores</i> |              |          |             |       |             |       |             |        |             |                                       |
| Hypogastruridae                |              |          | .64         | NB    | .41         |       |             |        |             |                                       |
| Onychuridae                    | +            |          | .58         | L/Tr  | <b>.097</b> |       |             |        |             | <b>Linear Model, Square Root (y)</b>  |
| Entomobryidae                  | +            | +        | .53         | NB    | <b>.008</b> |       |             |        |             |                                       |
| Isotomidae                     | +            |          | .96         | NB    | .68         |       |             |        |             |                                       |
| Tomoceridae                    | +            |          | <b>.014</b> | NB    |             | P     | .15         | NB     | <b>.020</b> |                                       |
| Sminthuridae                   | +            |          | .62         | NB    | .90         |       |             |        |             |                                       |
| Thysanoptera                   |              |          | <b>.10</b>  | Perm  | <b>.046</b> | Perm  | .70         | Perm   | .96         |                                       |
| Diptera (Trapped)              |              |          | .38         | P     | .32         |       |             |        |             |                                       |
| Lepidoptera larvae             |              |          | .55         | NB    | .44         |       |             |        |             |                                       |
| Larval Diptera                 |              |          | <b>.10</b>  | Perm  | <b>.092</b> | Perm  | .28         | Perm   | .16         |                                       |
| Adult Diptera                  | +            | +        | .52         | NB    | .23         |       |             |        |             |                                       |
|                                |              |          |             |       |             |       |             |        |             |                                       |
| <i>Mixed Trophic Levels</i>    |              |          |             |       |             |       |             |        |             |                                       |
| Larval Coleoptera              |              |          | .39         | NB    | .21         |       |             |        |             |                                       |
| Adult Coleoptera               |              |          | .33         | NB    | .28         |       |             |        |             |                                       |
|                                |              |          |             |       |             |       |             |        |             |                                       |
| <i>Predators</i>               |              |          |             |       |             |       |             |        |             |                                       |
| Cursorial spiders              | +            |          | .14         | NB    | <b>.074</b> |       |             |        |             |                                       |
| All spiders<br>(Kempson)       |              |          | .44         | NB    | .21         |       |             |        |             |                                       |
| Pseudoscorpiones               |              |          | .25         | NB    | .71         |       |             |        |             |                                       |
| Web spiders                    | +            |          | .91         | NB    | <b>.009</b> |       |             |        |             |                                       |
| Chilopoda                      |              |          | <b>.091</b> | Perm  | .36         | Perm  | <b>.047</b> | Perm   | <b>.024</b> | <b>Examine Plots; complex pattern</b> |

**Table S6.4: FALL, Years 2 and 3**

| Taxon<br>(response variable)   | Multivariate |    |          |    | Univariate                 |             |                 |                                                             |            |             | Notes |                                       |
|--------------------------------|--------------|----|----------|----|----------------------------|-------------|-----------------|-------------------------------------------------------------|------------|-------------|-------|---------------------------------------|
|                                | Spearman     |    | Multiple |    | ALL PLOTS                  |             |                 | Open                                                        |            | Fenced      |       |                                       |
|                                | Y2           | Y3 | Y2       | Y3 | R x Y x F<br>[Model in ()] | R x Y       | R               | R x Y                                                       | R          | R x Y       |       | R                                     |
| <i>Fungivores/Detritivores</i> |              |    |          |    |                            |             |                 |                                                             |            |             |       |                                       |
| Hypogastruidae                 | +            | +  |          | +  | .24 (Perm)                 | .24         | <b>.007</b>     | <b>Plot Means across Years: Resource = .001</b>             |            |             |       |                                       |
| Onychuridae                    | +            |    | +        |    | .98 (Perm)                 | <b>.02</b>  | <b>.010</b>     | <b>Year 2: Resource = .014; Year 3: Resource = .51</b>      |            |             |       |                                       |
| Entomobryidae                  | +            |    |          |    | .22 (NB)                   | .13         | <b>&lt;.001</b> |                                                             |            |             |       |                                       |
| Isotomidae                     |              |    |          |    | .13 (Perm)                 | <b>.055</b> | <b>.060</b>     | <b>Plot Means: Resource = .069 [Yr2 = .075; Yr3 = .053]</b> |            |             |       |                                       |
| Tomoceridae                    |              |    |          |    | .90 (P)                    | .16         | .76             |                                                             |            |             |       |                                       |
| Sminthuridae                   | +            |    | +        |    | .81 (Perm)                 | <b>.003</b> | <b>.001</b>     | <b>Year 2: Resource = .001; Year 3: Resource = .29</b>      |            |             |       |                                       |
| Thysanoptera                   | -            |    |          |    | .75 (Perm)                 | .45         | .53             |                                                             |            |             |       |                                       |
| Diptera (Trapped)              | +            |    |          |    | .58 (P)                    | .26         | <b>.097</b>     |                                                             |            |             |       |                                       |
| Lepidoptera larvae             |              | -  |          |    | .75 (P)                    | .21         | <b>.002</b>     |                                                             |            |             |       |                                       |
| Larval Diptera                 | +            | +  |          |    | .26 (P)                    | .61         | <b>&lt;.001</b> |                                                             |            |             |       |                                       |
| Adult Diptera                  |              |    |          |    | .14 (Perm)                 | .42         | .73             |                                                             |            |             |       |                                       |
| <i>Mixed Trophic Levels</i>    |              |    |          |    |                            |             |                 |                                                             |            |             |       |                                       |
| Larval Coleoptera              | +            |    |          |    | .14 (NB)                   | <b>.005</b> | <b>.004</b>     |                                                             |            |             |       |                                       |
| Adult Coleoptera               | +            |    |          |    | .42 (NB)                   | <b>.001</b> | <b>.009</b>     |                                                             |            |             |       |                                       |
| <i>Predators</i>               |              |    |          |    |                            |             |                 |                                                             |            |             |       |                                       |
| Cursorial spiders              |              |    |          |    | <b>.024</b> (NB)           | .53         | .15             | <b>.005</b>                                                 | .33        | .56         | .18   |                                       |
| All spiders<br>(Kempson)       |              |    |          |    | .30 (P)                    | .52         | .93             |                                                             |            |             |       |                                       |
| Pseudoscorpiones               |              |    |          |    | <b>.006</b> (NB)           |             |                 | .14                                                         | <b>.10</b> | <b>.003</b> | .17   | <b>Examine Plots; complex pattern</b> |
| Web spiders                    |              | -  |          | -  | .70 (Perm)                 | .12         | .58             |                                                             |            |             |       |                                       |
| Chilopoda                      |              |    |          |    | <b>.087</b> (Perm)         | 1.00        | .29             | .25                                                         | .15        | .27         | .14   |                                       |
