# Supplementary material for: Long-term resource addition to a detrital food web yields a pattern of responses more complex than pervasive bottom-up control
Source: PeerJ journal article supplement (doi:10.7717/peerj.3572), 2017-07-21
Supplement: Supplemental_Appendix_S7.pdf [file Supplemental_Appendix_S7.pdf]

## Supplemental Appendix S7

### Arthropod Data Set

Each line in the accompanying comma-delimited file (Supplemental Data S8) represents a sample from one of the 20 experimental units.

#### Design Variables

|          |                                                                                                                  |
|----------|------------------------------------------------------------------------------------------------------------------|
| Row      | 1-120; each row is a complete set of samples for one of 20 experimental units for a single sampling period 7-28; |
| Plot     | numbers used to designate each of 20 exp. units A =                                                              |
| Resource | Ambient, S = Supplemented                                                                                        |
| Fencing  | F = Fenced, O = Open                                                                                             |
| Year     | 1, 2, 3 -- 1997, 1998, 1999, respectively                                                                        |
| Season   | S=Summer, F=Fall                                                                                                 |
|          | NOTE: Values for Year = 1, Season = S are averages of July and August samples                                    |

#### Response Variables

|                               |                                                           |
|-------------------------------|-----------------------------------------------------------|
| <i>Kempson Samples</i>        | Number extracted per single 0.05 sq.-m sample of litter   |
| Thy                           | Thysanoptera (thrips)                                     |
| Acol                          | Beetles (Coleoptera) -- Adults                            |
| Adip                          | Diptera (flies) --- adults                                |
| Lcol                          | Beetle larvae                                             |
| Llep                          | Lepidoptera (moths, etc) larvae                           |
| Ldip                          | Diptera larvae                                            |
| Ara                           | Spiders (Araneae)                                         |
| Pse                           | Pseudoscorpiones(Pseudoscorpions)                         |
| Chi                           | Centipedes (Chilopoda)                                    |
| Ent                           | Entomobryidae (Collembola --- springtails)                |
| Iso                           | Isotomidae (Collembola --- springtails)                   |
| Tom                           | Tomoceridae (Collembola --- springtails) Onychiuridae     |
| Ony                           | (Collembola --- springtails) Sminthuridae (Collembola     |
| Smi                           | --- springtails) Hypogastruridae (Collembola ---          |
| Hyp                           | springtails)                                              |
| <i>Sticky Trap Samples</i>    | Number per trap                                           |
| TrpDip                        | Adult Diptera                                             |
| <i>Litter Sifting Samples</i> | Number per 0.2 sq.-m sample of litter sorted in the field |
| Cur                           | Cursorial spiders                                         |
| Web                           | Web-building spiders                                      |

**No. of Response Variables = 18**
